# Supplementary material for: Structure and activity relationship studies of N-heterocyclic olefin and thiourea/urea catalytic systems: application in ring-opening polymerization of lactones
Source: Royal Society of Chemistry journal article supplement (doi:10.1039/d0py01747g), 2021-01-01
Supplement: d0py01747g1.pdf [file d0py01747g1.pdf]

Supplementary Information

for

**Structure and Activity Relationship Studies of *N*-Heterocyclic  
Olefins and Thioureas/Ureas Catalytic System: Application in  
Ring-opening Polymerization of Lactones**

Li Zhou ‡<sup>a</sup>, Zhenyu Wang ‡<sup>a</sup>, Guangqiang Xu <sup>\*a,b</sup>, Chengdong Lv <sup>a,b</sup>, Qinggang Wang <sup>\*a,b</sup>

<sup>a</sup> Key Laboratory of Biobased Materials, Qingdao Institute of Bioenergy and Bioprocess Technology, Chinese Academy of Sciences, Qingdao, 266101, China. E-mail: wangqg@qibebt.ac.cn.

<sup>b</sup> Center of Materials Science and Optoelectronics Engineering, University of Chinese Academy of Sciences, Beijing, 100049, China.

## Table of Contents

|                                                                                                             |    |
|-------------------------------------------------------------------------------------------------------------|----|
| <b>1. General Experimental Procedure</b> .....                                                              | 3  |
| Preparation of NHOs.....                                                                                    | 3  |
| Preparation of TUs/Us .....                                                                                 | 3  |
| <b>2. p<i>K</i><sub>a</sub> determination of NHOs</b> .....                                                 | 4  |
| Figure S1. <sup>1</sup> H NMR of NHOs and BnOH.....                                                         | 5  |
| Figure S2. <sup>1</sup> H NMR of NHO5 precursor salt, <sup>t</sup> Bu-P <sub>1</sub> and combinations ..... | 5  |
| Figure S3. <sup>1</sup> H NMR of NHO5 precursor salt, <sup>t</sup> Bu-P <sub>2</sub> and combinations ..... | 6  |
| Figure S4. <sup>1</sup> H NMR of NHO1 precursor salt, DBU and combinations .....                            | 6  |
| Figure S5. <sup>1</sup> H NMR of NHO1, TU5 and combinations .....                                           | 7  |
| Figure S6. <sup>1</sup> H NMR of NHO2, TU5 and combinations .....                                           | 7  |
| Figure S7. <sup>1</sup> H NMR of NHO3, U8 and combinations.....                                             | 8  |
| Figure S8. <sup>1</sup> H NMR of NHO3 and U6.....                                                           | 8  |
| Figure S9. <sup>1</sup> H NMR of NHO3, U5 and combinations .....                                            | 9  |
| Figure S10. <sup>1</sup> H NMR of NHO3 and U5.....                                                          | 9  |
| <b>3. <sup>1</sup>H NMR Spectra</b> .....                                                                   | 9  |
| Figure S11. Homonuclear decoupled <sup>1</sup> H NMR .....                                                  | 10 |
| Figure S12. Homonuclear decoupled <sup>1</sup> H NMR .....                                                  | 11 |
| Figure S13. Homonuclear decoupled <sup>1</sup> H NMR .....                                                  | 11 |
| Figure S14. Homonuclear decoupled <sup>1</sup> H NMR .....                                                  | 12 |
| Figure S15. <sup>1</sup> H NMR spectra of the obtained PVL.....                                             | 12 |
| Figure S16. <sup>1</sup> H NMR spectra of the obtained PCL.....                                             | 13 |
| Figure S17. <sup>1</sup> H NMR spectra of the obtained PLA.....                                             | 13 |
| <b>4. GPC curves of various polymer</b> .....                                                               | 14 |
| Figure S18. GPC curves of the obtained PVL .....                                                            | 14 |
| Figure S19. GPC curves of the obtained PCL .....                                                            | 14 |
| Figure S20. GPC curves of the obtained PLA at room temperature.....                                         | 14 |
| Figure S21. GPC curves of the obtained PLA at low temperature .....                                         | 15 |
| Figure S22. GPC curves of the obtained PVL .....                                                            | 15 |
| Figure S23. GPC curves of the obtained PVL .....                                                            | 15 |

|                                                                                    |    |
|------------------------------------------------------------------------------------|----|
| <b>5. Experimental data</b> .....                                                  | 15 |
| Table S1. $k_{obs}$ for $\delta$ -VL ROP with NHO3 and different TUs (Us) .....    | 16 |
| Table S2. ROPs of $\delta$ -VL with various ratios of monomer/initiator .....      | 16 |
| Table S3. The results of monomer conversion and molecular weight versus time ..... | 17 |
| <b>6. MALDI-TOF MS spectrum</b> .....                                              | 17 |
| Figure S24. MALDI-TOF MS spectrum of the obtained PCL sample.....                  | 17 |
| <b>References</b> .....                                                            | 18 |

## 1. General Experimental Procedure

### Preparation of NHOs

The depicted *N*-Heterocyclic Olefins (NHOs) have been synthesized according to literature-known procedures. NHOs were synthesized by deprotonation of the corresponding precursor salt (Scheme S1) using KHMDS and they were stored in a glove box at -25 °C. For full characterization of NHO1, NHO2, NHO3, NHO4 and NHO5 see the cited literature.<sup>1-5</sup>

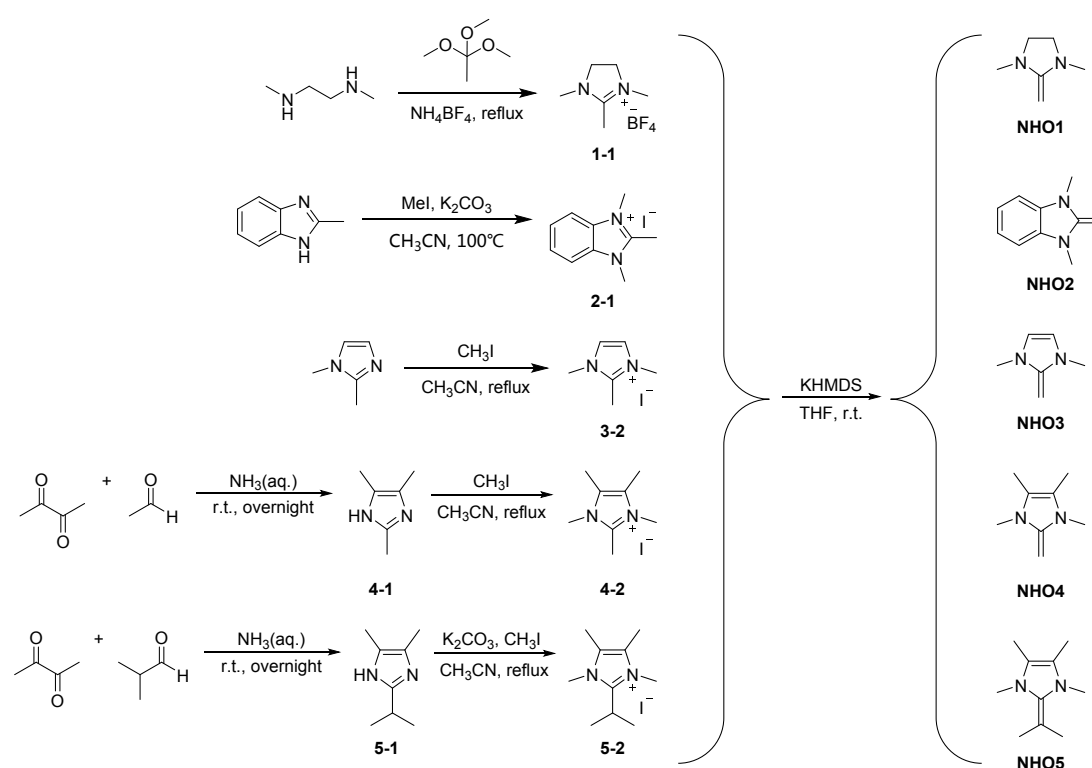

**Scheme S1.** Synthetic routes for the NHOs employed in this study.

### Preparation of TUs/Us

The depicted thioureas (TUs) and ureas (Us) are prepared by mixing the appropriate amine and isothiocyanate in a solution of MeOH (Scheme S2). The solution was stirred in the room temperature for 30 min. Then MeOH is removed under vacuum and the products were purified by washing with hexanes three times. After vacuum

filtration, the filter residue was vacuum drying at 50 °C for 24 h. For full characterization of TU1, TU2, TU3, TU4, TU5, TU6, U1, U2 and U8 see the cited literature.<sup>6-10</sup> U3, U4, U5, U6 and U7 were purchased from commercial suppliers and dried under vacuum at 50 °C for 24 hours.

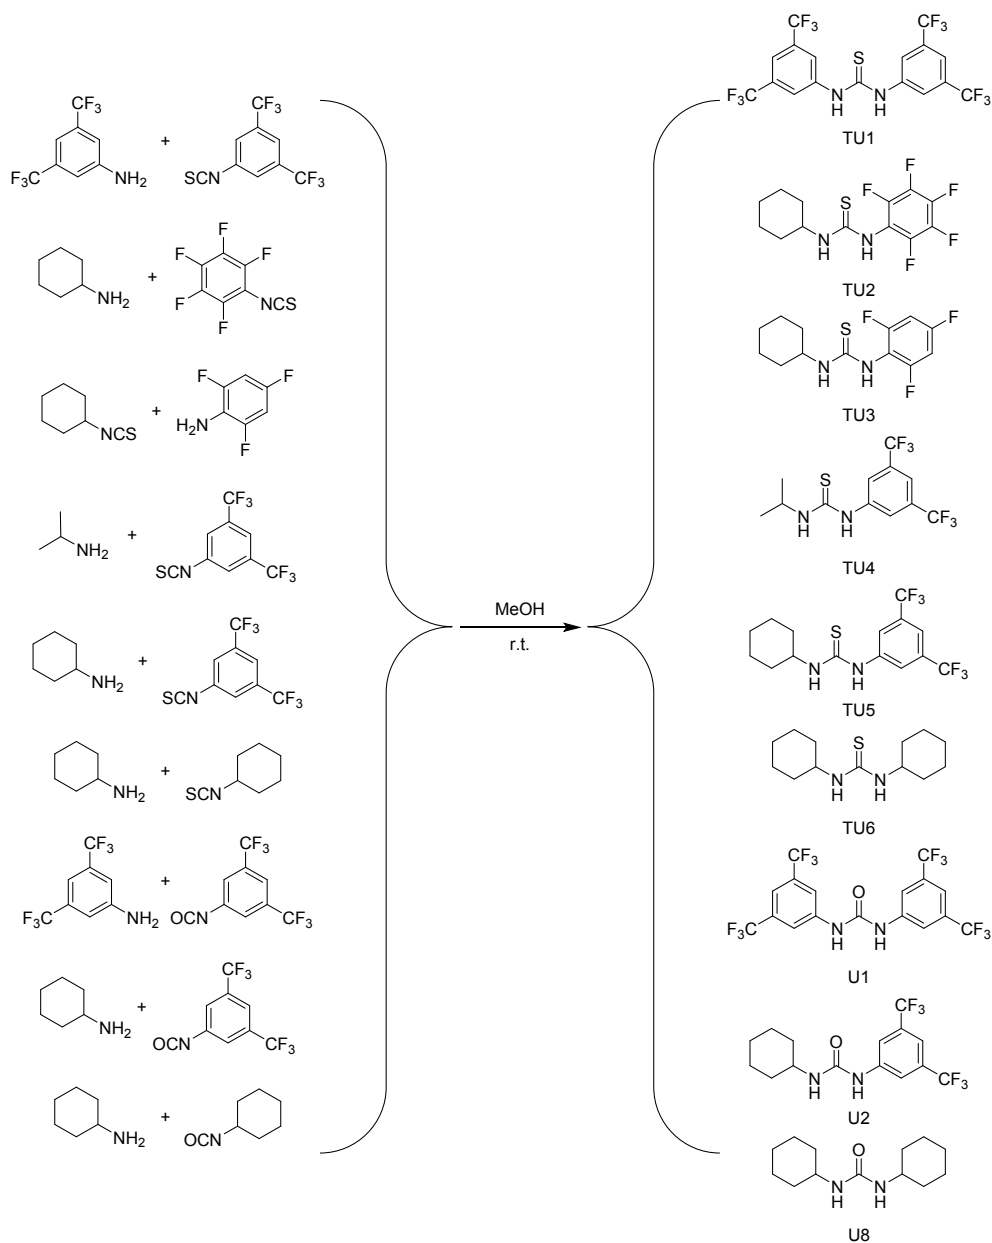

**Scheme S2.** Synthetic routes for the TUs/Us.

## 2. $pK_a$ determination of NHOs

When NHOs and BnOH were mixed together, the methylene group of BnOH shifted downfield. The stronger the basicity of NHOs, the greater the chemical shift of the methylene group of BnOH.

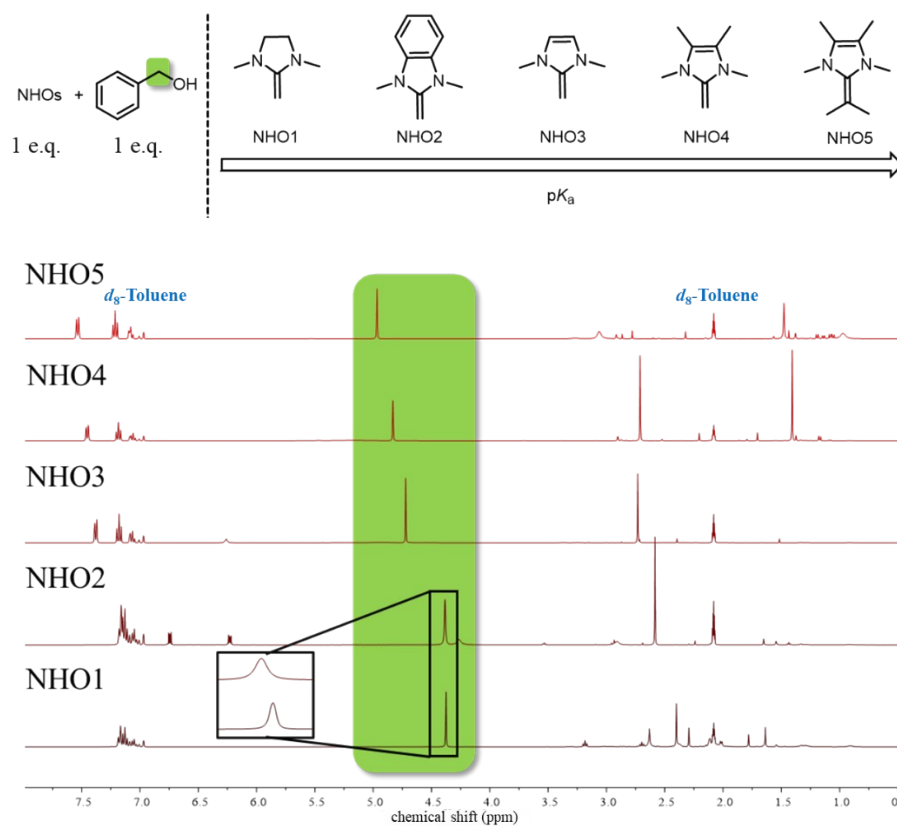

**Figure S1.**  $^1\text{H}$  NMR ( $d_8$ -Toluene, 400 MHz) of NHOs and BnOH (NHOs:BnOH =1:1).

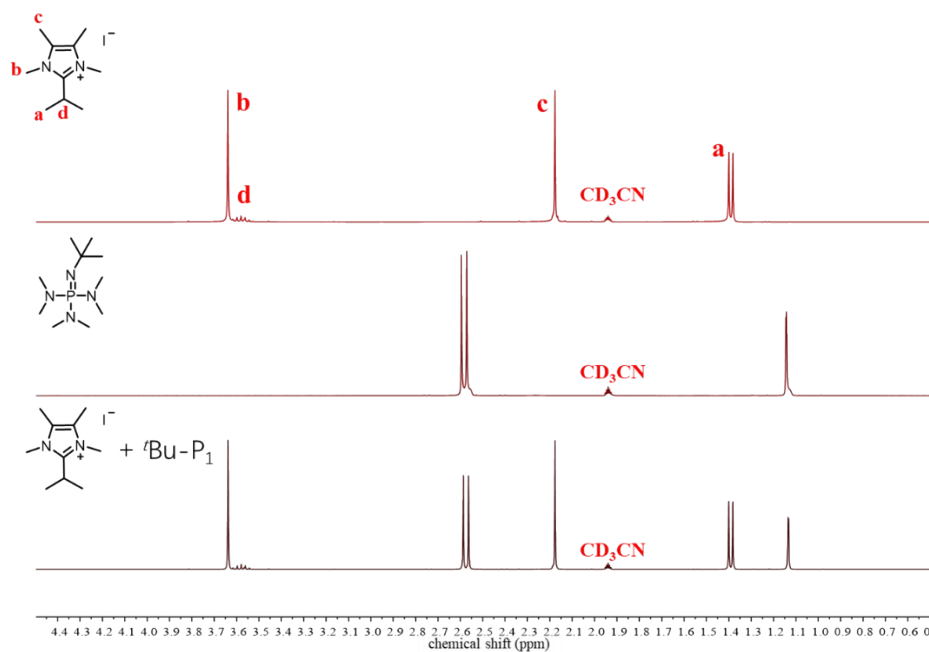

**Figure S2.**  $^1\text{H}$  NMR ( $d_3$ -MeCN, 400 MHz) of NHO5 precursor salt,  $t\text{Bu-P}_1$  and combinations (NHO5 precursor salt:  $t\text{Bu-P}_1$  =2:1).

The NMR signal of the “d” methyne group remained unchanged when  $t\text{Bu-P}_1$  ( $pK_a = 26.9$ ) was

used to deprotonate the NHO5 precursor salt, which proves that NHO5 exhibits a higher  $pK_a$  than  $t\text{Bu-P}_1$  ( $pK_a[\text{NHO5}] > 26.9$ ).

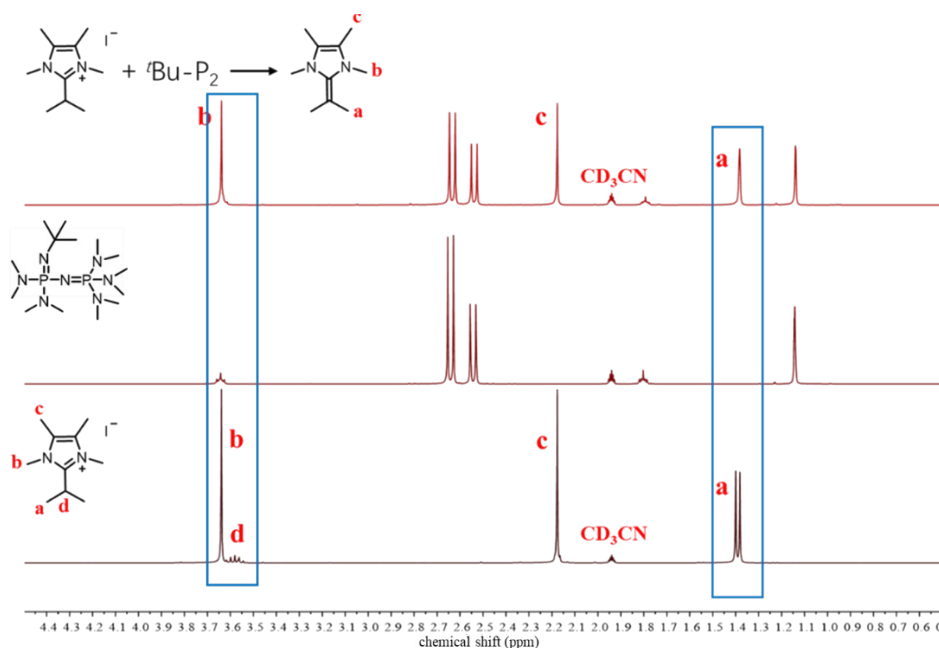

**Figure S3.**  $^1\text{H}$  NMR ( $d_3\text{-MeCN}$ , 400 MHz) of NHO5 precursor salt,  $t\text{Bu-P}_2$  and combinations (NHO5 precursor salt:  $t\text{Bu-P}_2$  =2:1).

The signal of the “d” methyne group disappeared when the  $t\text{Bu-P}_2$  ( $pK_a = 33.5$ ) base was used for the deprotonation of NHO5 precursor salt, which proves that  $t\text{Bu-P}_2$  exhibits a higher  $pK_a$  than NHO5 ( $pK_a[\text{NHO5}] < 33.5$ ).

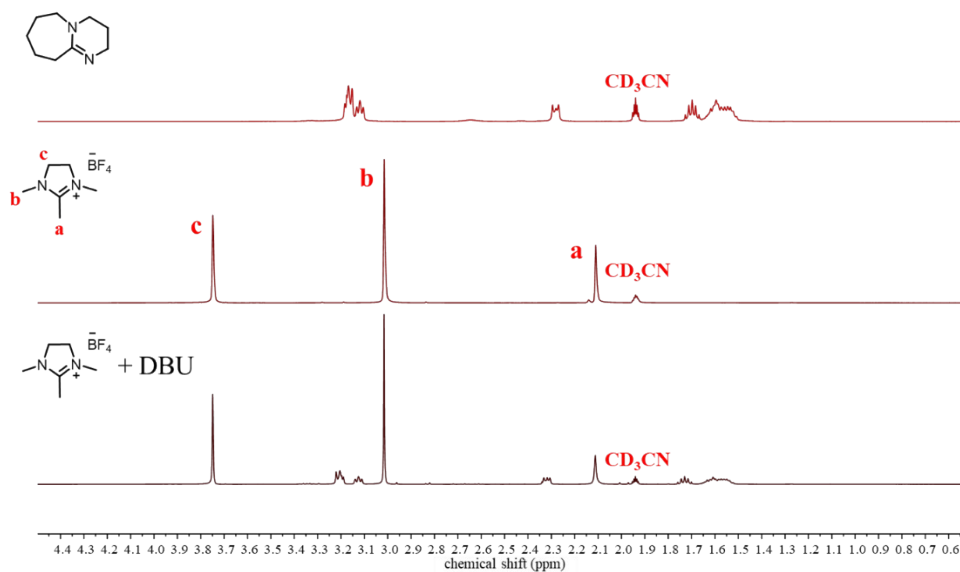

**Figure S4.**  $^1\text{H}$  NMR ( $d_3\text{-MeCN}$ , 400 MHz) of NHO1 precursor salt, DBU and combinations (NHO1 precursor salt: DBU =2:1).

The NMR signal of the “a” methyl group remained unchanged when DBU ( $pK_a = 24.3$ ) was used to deprotonate the NHO1 precursor salt, which proves that NHO1 exhibits a higher  $pK_a$  than DBU ( $pK_a[\text{NHO1}] > 24.3$ ).

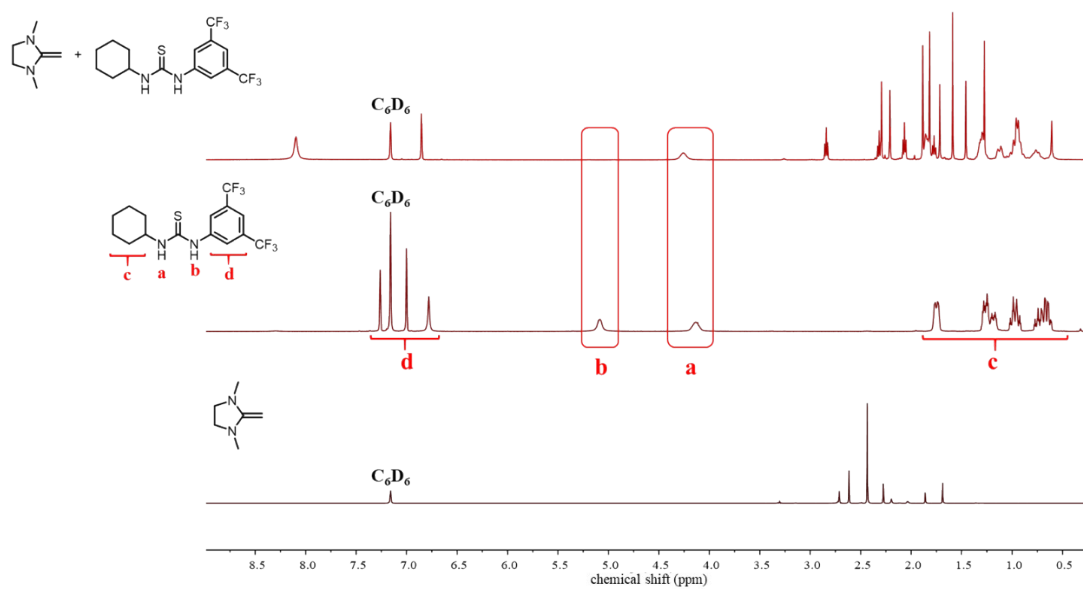

**Figure S5.**  $^1\text{H}$  NMR ( $\text{C}_6\text{D}_6$ , 400 MHz) of NHO1, TU5 and combinations (NHO1:TU5=1:1).

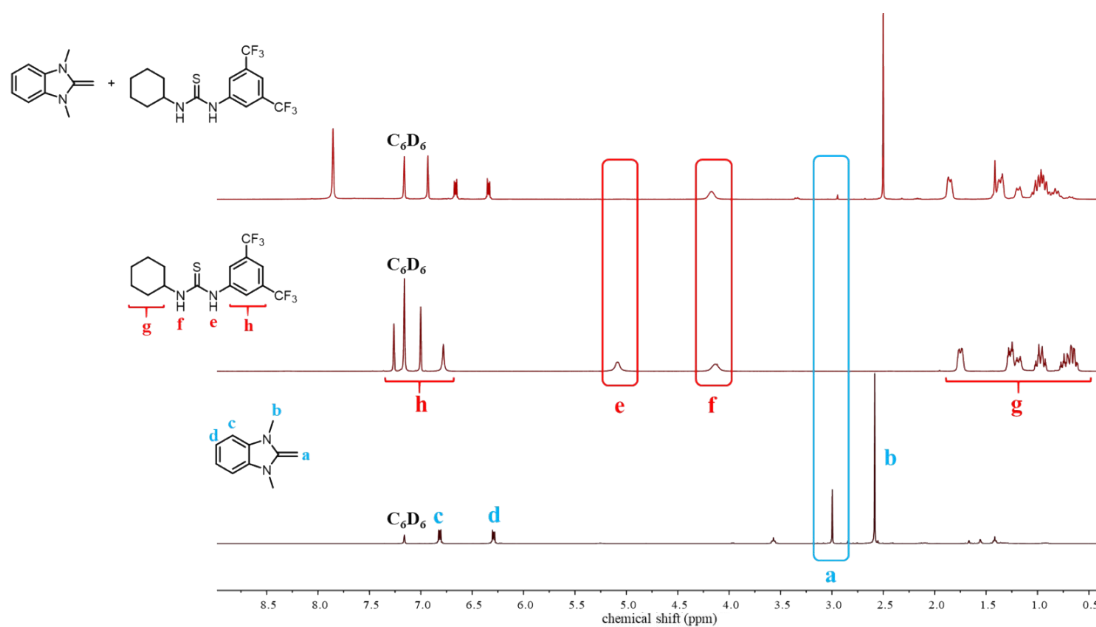

**Figure S6.**  $^1\text{H}$  NMR ( $\text{C}_6\text{D}_6$ , 400 MHz) of NHO2, TU5 and combinations (NHO2:TU5=1:1).



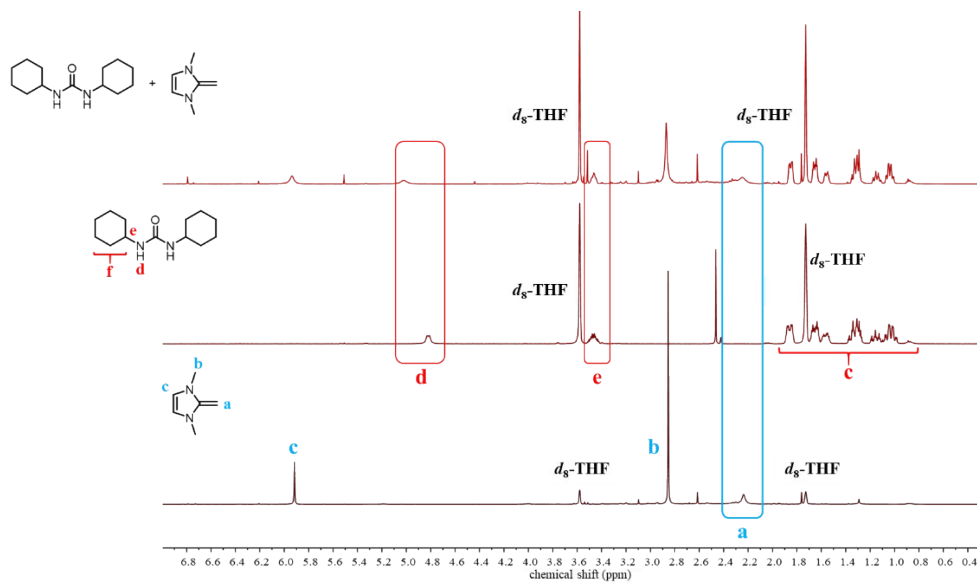

**Figure S7.**  $^1\text{H}$  NMR ( $d_8$ -THF, 400 MHz) of NHO3, U8 and combinations (NHO3:U8=1:1).

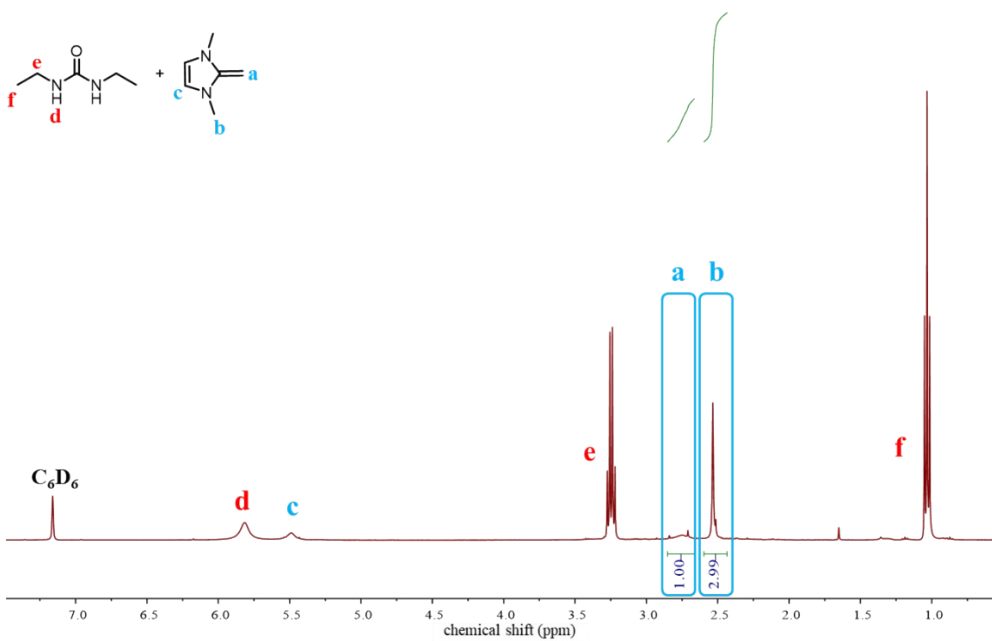

**Figure S8.**  $^1\text{H}$  NMR ( $\text{C}_6\text{D}_6$ , 400 MHz) of NHO3 and U6 (NHO3:U6=1:1).

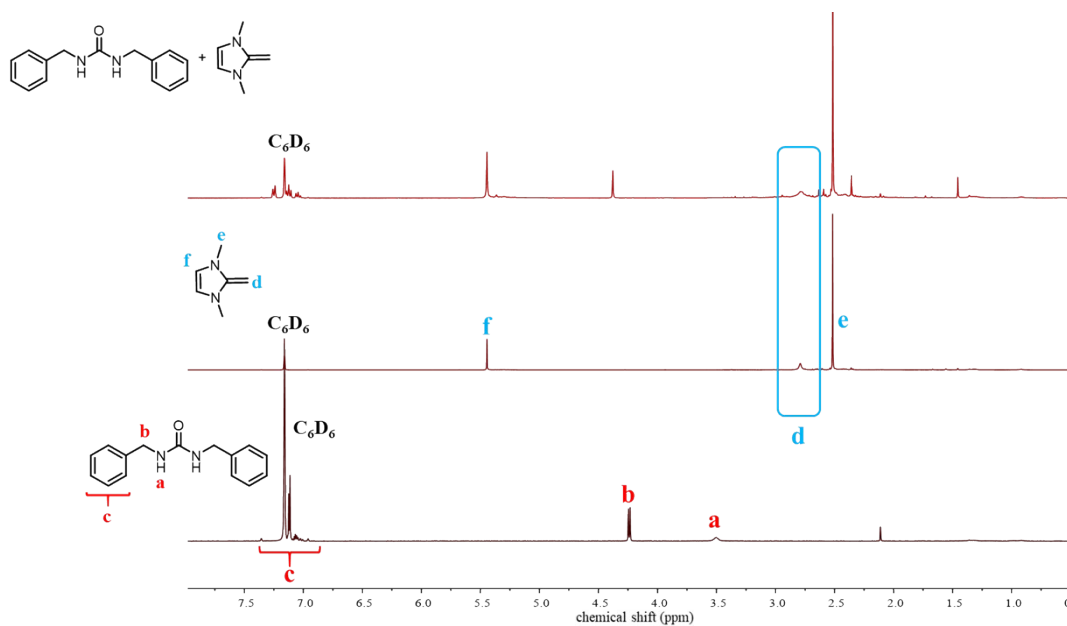

**Figure S9.**  $^1\text{H}$  NMR ( $\text{C}_6\text{D}_6$ , 400 MHz) of NHO3, U5 and combinations (NHO3:U5=1:1).

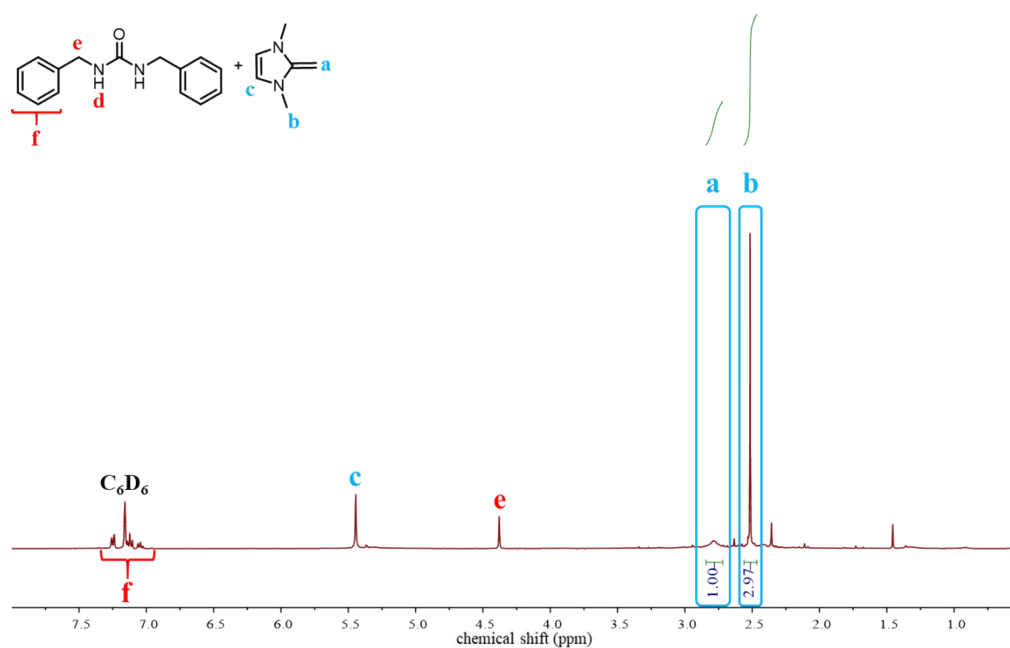

**Figure S10.**  $^1\text{H}$  NMR ( $\text{C}_6\text{D}_6$ , 400 MHz) of NHO3 and U5 (NHO3:U5=1:1).

### 3. $^1\text{H}$ NMR Spectra

For homonuclear decoupled  $^1\text{H}$  NMR analysis, acquisition time was measured and fixed to 2.04 s. Samples were obtained in  $\text{CDCl}_3$  solutions with the decoupling pulse

based on the methyl region ( $\delta = 1.5$  ppm). In case of the good separation of methine region ( $\delta = 5.00$ - $5.20$  ppm), both Bernoullian statistics (chain-end control mechanism, CEC) and non-Bernoullian statistics (enantiomorphic site control mechanism, ESC) were used to calculate  $P_m$  values.<sup>11</sup>

|                | Probability of ESC (non-Bernoullian)  | Probability of CEC (Bernoullian) |
|----------------|---------------------------------------|----------------------------------|
| [ <i>mmm</i> ] | $[P_m^2+(1-P_m)^2+P_m^3+(1-P_m)^3]/2$ | $P_m^2+0.5 P_m P_r$              |
| [ <i>rmm</i> ] | $[P_m^2(1-P_m) + P_m(1-P_m)^2]/2$     | $0.5 P_m P_r$                    |
| [ <i>mmr</i> ] | $[P_m^2(1-P_m) + P_m(1-P_m)^2]/2$     | $0.5 P_m P_r$                    |
| [ <i>rmr</i> ] | $[P_m^2(1-P_m) + P_m(1-P_m)^2]/2$     | $0.5 P_r^2$                      |
| [ <i>mr</i> ]  | $[P_m(1-P_m)]$                        | $0.5 (P_m^2+P_m P_r)$            |

$P_r$  has meaning of racemic enchainment, and  $P_m+P_r=1$ .

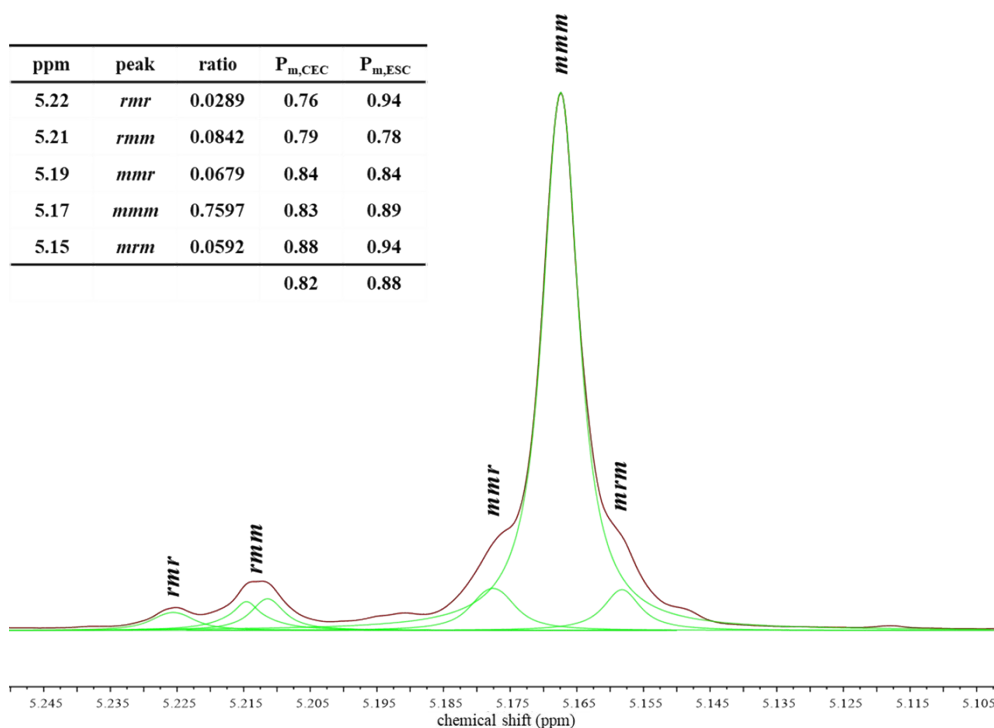

**Figure S11.** Homuncular decoupled  $^1\text{H}$  NMR (Table 4, entry 1).

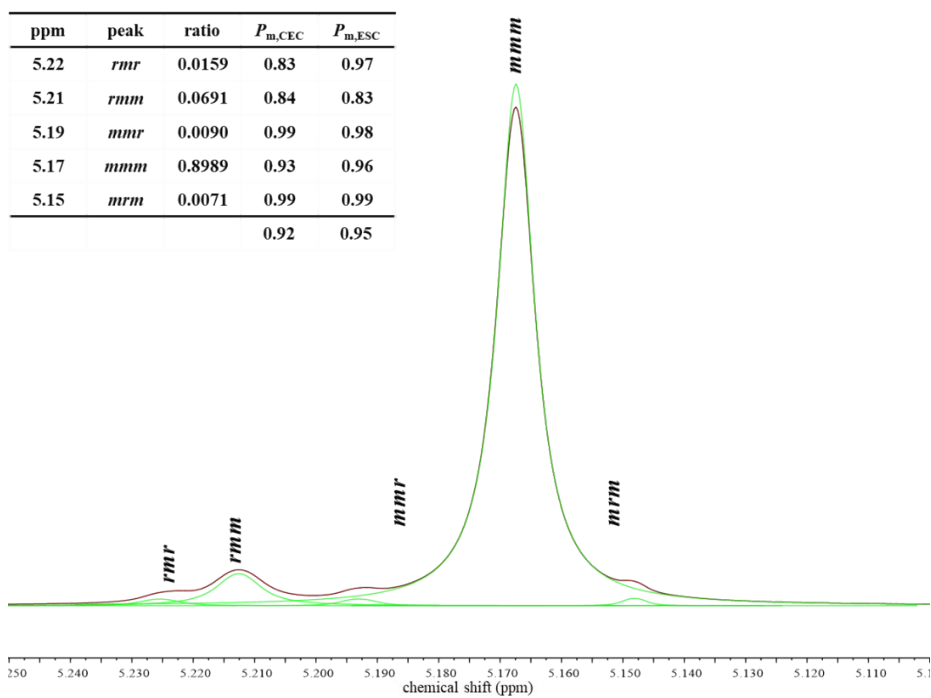

**Figure S12.** Homuncular decoupled  $^1\text{H}$  NMR (Table 4, entry 3).

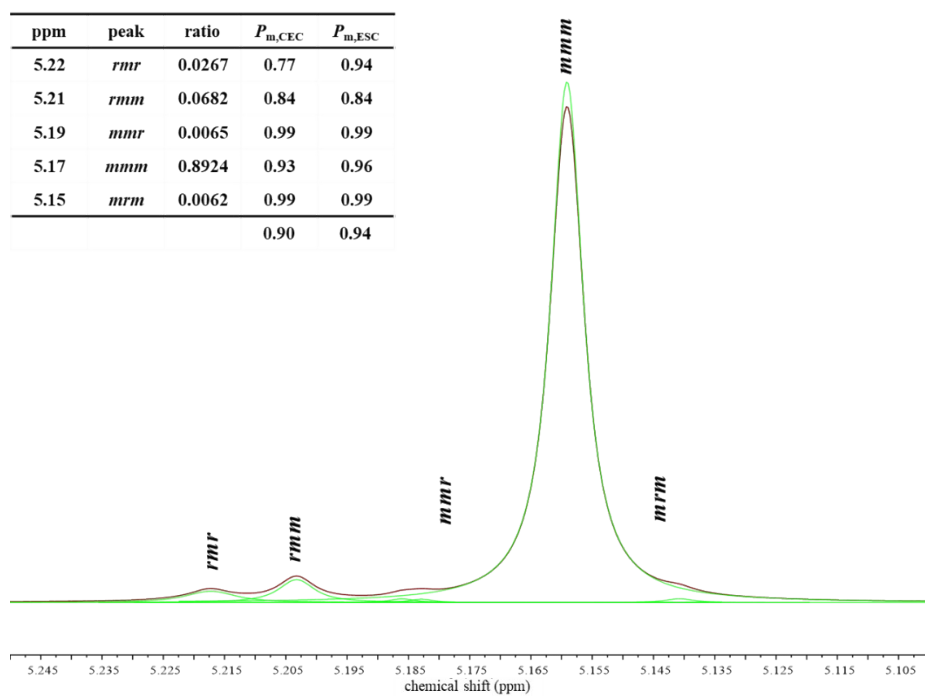

**Figure S13.** Homuncular decoupled  $^1\text{H}$  NMR (Table 4, entry 4).

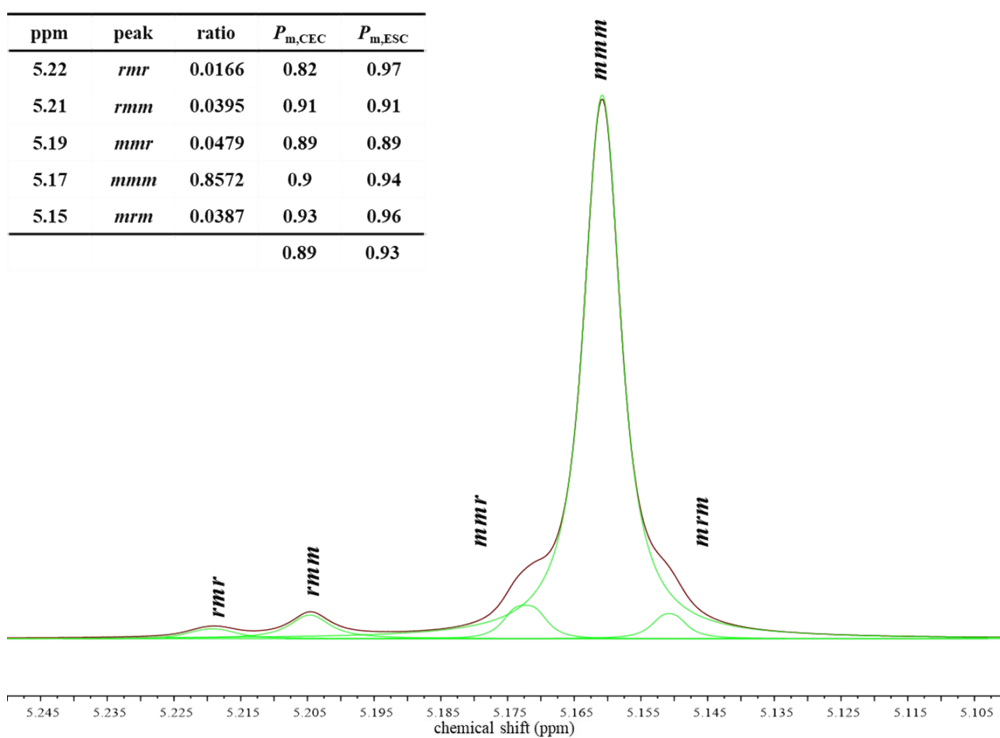

**Figure S14.** Homonuclear decoupled  $^1\text{H}$  NMR (Table 4, entry 6).

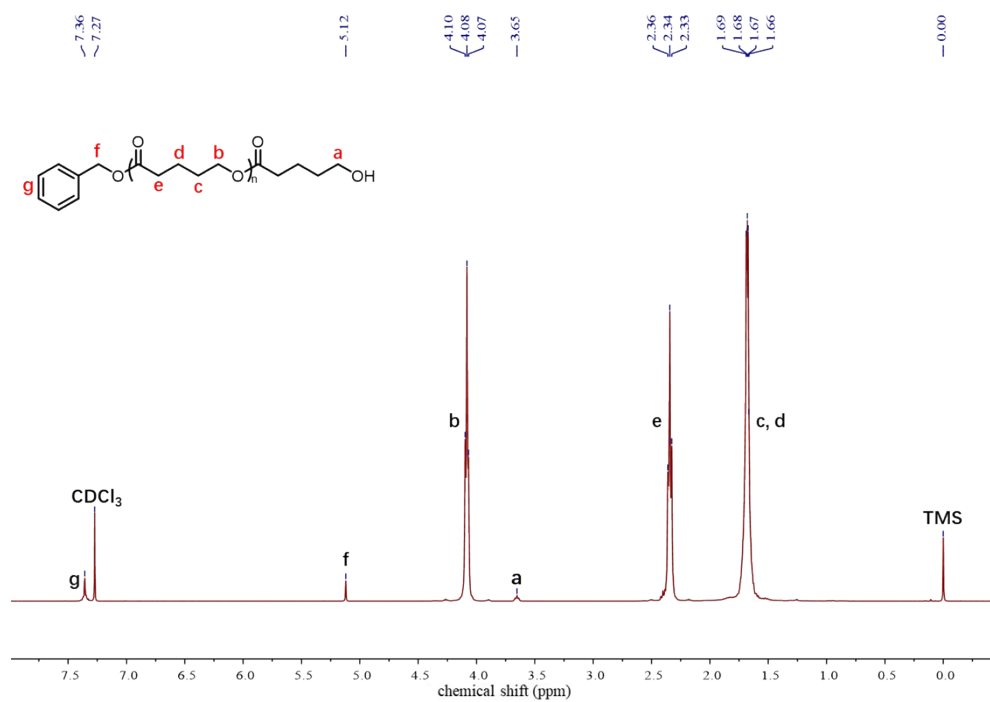

**Figure S15.**  $^1\text{H}$  NMR ( $\text{CDCl}_3$ , 400 MHz) spectra of the obtained PVL.

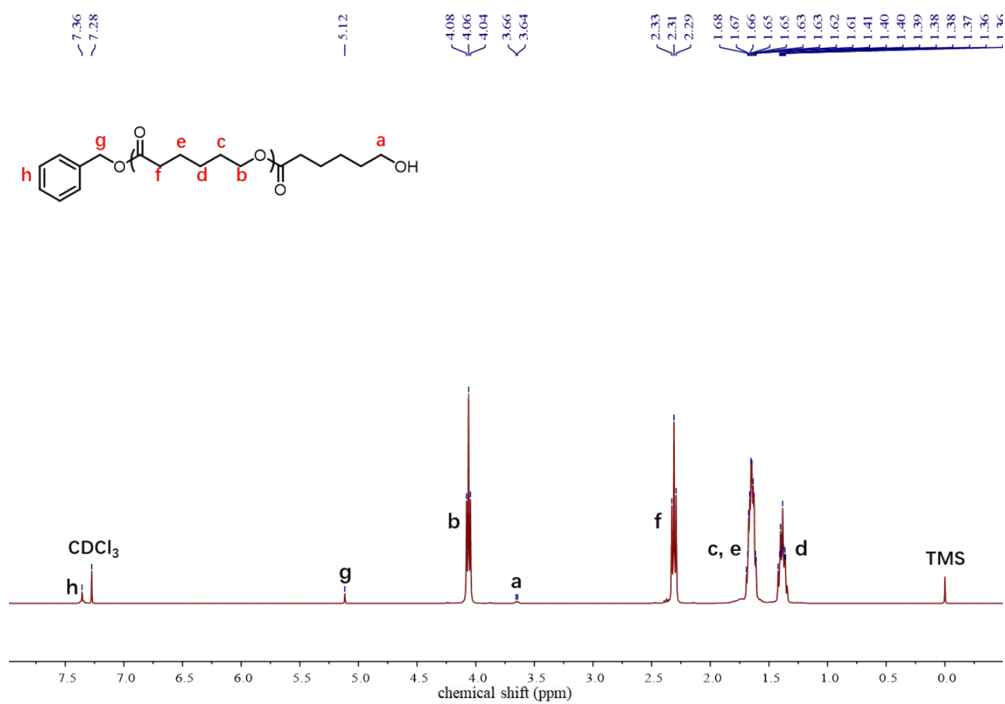

Figure S16. <sup>1</sup>H NMR (CDCl<sub>3</sub>, 400 MHz) spectra of the obtained PCL.

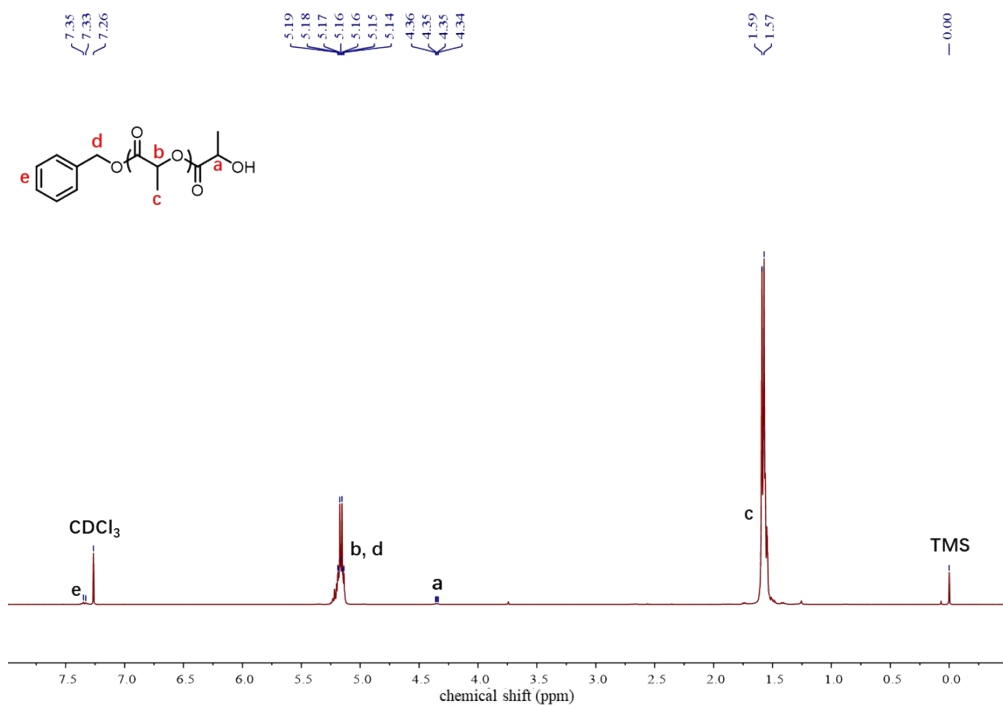

Figure S17. <sup>1</sup>H NMR (CDCl<sub>3</sub>, 400 MHz) spectra of the obtained PLA.

#### 4. GPC curves of various polymer

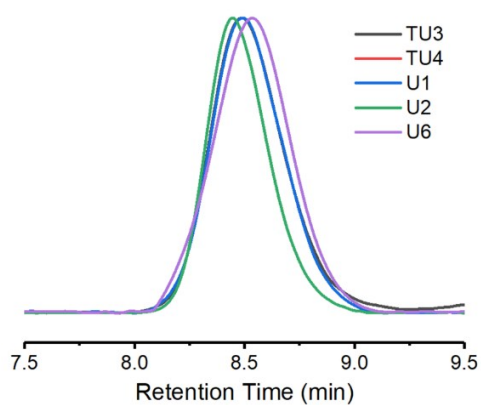

**Figure S18.** GPC curves of the obtained PVL (Table 1).

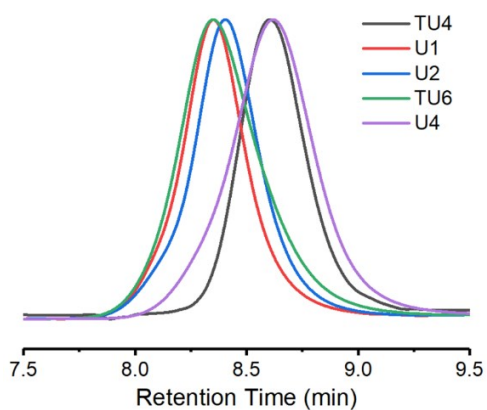

**Figure S19.** GPC curves of the obtained PCL (Table 2).

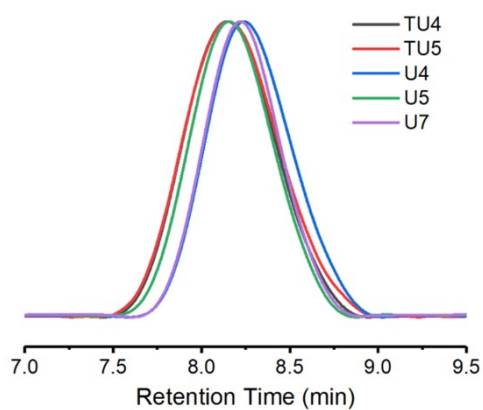

**Figure S20.** GPC curves of the obtained PLA at room temperature (Table 3).

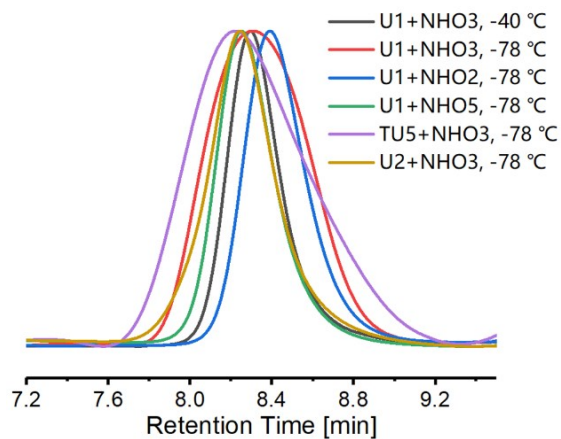

**Figure S21.** GPC curves of the obtained PLA at low temperature (Table 4).

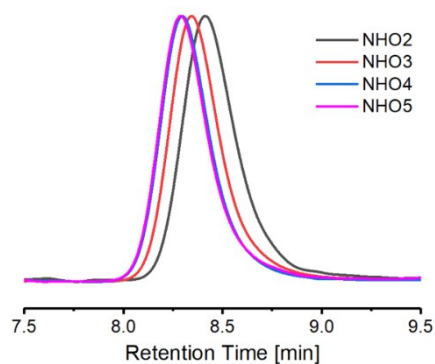

**Figure S22.** GPC curves of the obtained PVL (Table 5, entries 2-5).

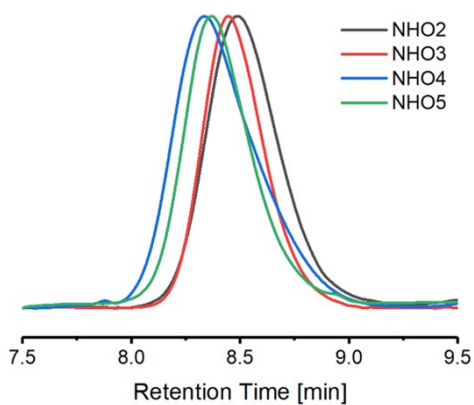

**Figure S23.** GPC curves of the obtained PVL (Table 5, entries 7-10).

## 5. Experimental data



**Table S1.**  $k_{\text{obs}}$  for  $\delta$ -VL ROP with NHO3 and different TUs (Us) <sup>a</sup>

| TUs/Us | $k_{\text{obs}}$ (min <sup>-1</sup> )     |
|--------|-------------------------------------------|
| TU1    | $7.1 \cdot 10^{-6} \pm 2.1 \cdot 10^{-8}$ |
| TU2    | $7.2 \cdot 10^{-6} \pm 3.2 \cdot 10^{-8}$ |
| TU3    | $0.00072 \pm 2.4 \cdot 10^{-5}$           |
| TU4    | $0.0016 \pm 6.4 \cdot 10^{-5}$            |
| TU5    | $0.0034 \pm 9.5 \cdot 10^{-5}$            |
| U1     | $0.148 \pm 0.0031$                        |
| U2     | $0.064 \pm 0.0018$                        |
| U3     | $0.138 \pm 0.0013$                        |
| TU6    | $0.322 \pm 0.013$                         |
| U4     | $0.537 \pm 0.019$                         |
| U5     | $0.0055 \pm 2.3 \cdot 10^{-4}$            |
| U6     | $0.0014 \pm 6.1 \cdot 10^{-5}$            |
| U7     | $0.0013 \pm 6.5 \cdot 10^{-5}$            |
| U8     | $0.00082 \pm 3.3 \cdot 10^{-5}$           |

<sup>a</sup>Reaction conditions:  $[\text{NHO3}]_0:[\text{TU/U}]_0:[\text{BnOH}]_0:[\text{VL}]_0 = 1:2:2:800$  in toluene at room temperature,  $[\text{VL}]_0 = 3.4$  mol/L.

**Table S2.** ROPs of  $\delta$ -VL with various ratios of monomer/initiator <sup>a</sup>

| Entry | NHO3/U1/BnOH/ $\delta$ -VL | Time   | Conv. <sup>b</sup> | $M_{n,\text{cal}}$ (g/mol) | $M_{n,\text{exp}}$ (g/mol) <sup>c</sup> | $\bar{D}$ <sup>c</sup> |
|-------|----------------------------|--------|--------------------|----------------------------|-----------------------------------------|------------------------|
| 1     | 1/2/2/100                  | 30 s   | 95 %               | 4800                       | 5400                                    | 1.14                   |
| 2     | 1/2/2/200                  | 5 min  | 98 %               | 9800                       | 12200                                   | 1.15                   |
| 3     | 1/2/2/400                  | 10 min | 94 %               | 18800                      | 19500                                   | 1.16                   |
| 4     | 1/2/2/800                  | 30 min | 96 %               | 38400                      | 34300                                   | 1.22                   |

<sup>a</sup> Polymerization conditions: room temperature, toluene as solvent, the reactions were carried in sealed tube. <sup>b</sup> Determined by <sup>1</sup>H NMR in CDCl<sub>3</sub> using integrals of the characteristic signals. <sup>c</sup> Number-average molar mass ( $M_n$ ) and dispersity values were determined by GPC in THF at 25 °C using polystyrene standards for calibration, and corrected using the factor 0.57 for PVL.

**Table S3.** The results of monomer conversion and molecular weight versus time <sup>a</sup>

| Time   | Conv. <sup>b</sup> | $M_{n,cal}$ (g/mol) | $M_{n,exp}$ (g/mol) <sup>c</sup> | $\mathcal{D}$ <sup>c</sup> |
|--------|--------------------|---------------------|----------------------------------|----------------------------|
| 30 min | 8 %                | 4600                | 4200                             | 1.12                       |
| 2 h    | 26 %               | 14800               | 13300                            | 1.10                       |
| 4 h    | 51 %               | 29100               | 22300                            | 1.15                       |
| 6 h    | 68 %               | 38800               | 31000                            | 1.18                       |
| 8 h    | 80 %               | 45700               | 38100                            | 1.21                       |
| 10 h   | 98 %               | 55900               | 46100                            | 1.46                       |

<sup>a</sup> Unless otherwise specified, reaction conditions are  $[\text{NHO}_3]_0:[\text{U}1]_0:[\text{BnOH}]_0:[\epsilon\text{-CL}]_0 = 1:2:2:1000$  in toluene at room temperature. <sup>b</sup>

Determined by <sup>1</sup>H NMR in  $\text{CDCl}_3$  using integrals of the characteristic signals. <sup>c</sup> Number-average molar mass ( $M_n$ ) and dispersity values were determined by GPC in THF at 25 °C using polystyrene standards for calibration, and corrected using the factor 0.56 for PCL.

## 6. MALDI-TOF MS spectrum

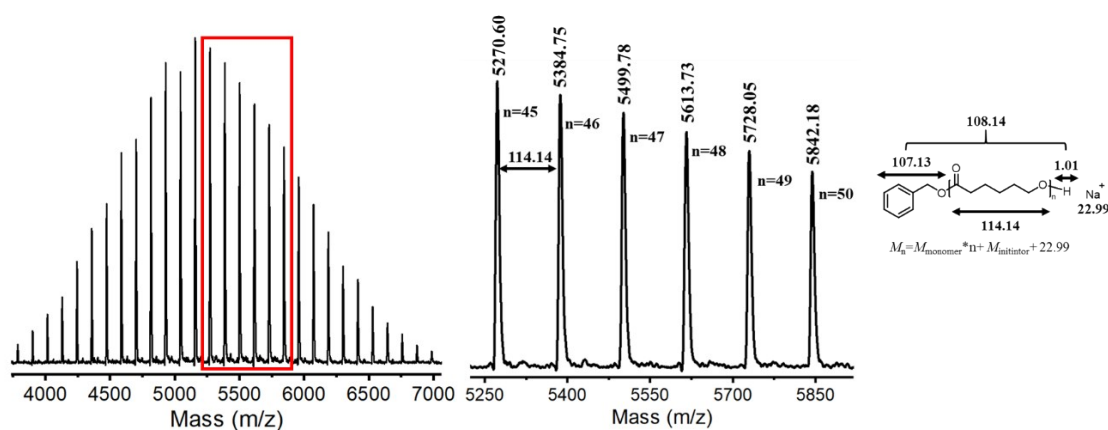**Figure S24.** MALDI-TOF MS spectrum of the obtained PCL sample ( $\text{NHO}_3/\text{U}1/\text{BnOH}/\epsilon\text{-CL} = 1:2:2:200$ ).

## References

1. W.-C. Chen, J.-S. Shen, T. Jurca, C.-J. Peng, Y.-H. Lin, Y.-P. Wang, W.-C. Shih, G. P. A. Yap and T.-G. Ong, *Angew. Chem., Int. Ed.*, 2015, **54**, 15207-15212.
2. S. Naumann, A. W. Thomas and A. P. Dove, *Angew. Chem., Int. Ed.*, 2015, **54**, 9550-9554.
3. V. B. Saptal and B. M. Bhanage, *ChemSusChem*, 2016, **9**, 1980-1985.
4. P. Walther, W. Frey and S. Naumann, *Polym. Chem.*, 2018, **9**, 3674-3683.
5. S. Kronig, P. G. Jones and M. Tamm, *Eur. J. Inorg. Chem.*, 2013, **13**, 2301-2314.
6. V. Štrukil, M. D. Igrc, M. Eckert-Maksić and T. Friščić, *Chem. Eur. J.*, 2012, **18**, 8464-8473.
7. C. B. Tripathi and S. Mukherjee, *Org. Lett.*, 2014, **16**, 3368-3371.
8. J. Sun, and D. Kuckling, *Polym. Chem.*, 2016, **7**, 1642-1649.
9. Z.-L. Jiang; J.-P. Zhao and G.-Z. Zhang, *Chinese J. Polym. Sci.*, 2019, **37**, 1205-1214.
10. L. Zhou, G. Xu, Q. Mahmood, C. Lv, X. Wang, X. Sun, K. Guo and Q. Wang, *Polym. Chem.*, 2019, **10**, 1832-1838.
11. B. Orhan, M. J.-L. Tschan, A.-L. Wirotius, A. P. Dove, O. Coulembier and D. Taton, *ACS Macro. Lett.*, 2018, **7**, 1413-1419.
